# Supplementary material for: The external domains of the HIV-1 envelope are a mutational cold spot
Source: PubMed Central journal article supplement (PMC4687473; doi:10.1038/ncomms9571), 2015-10-09
Supplement: ncomms9571-s1.pdf [file ncomms9571-s1.pdf]

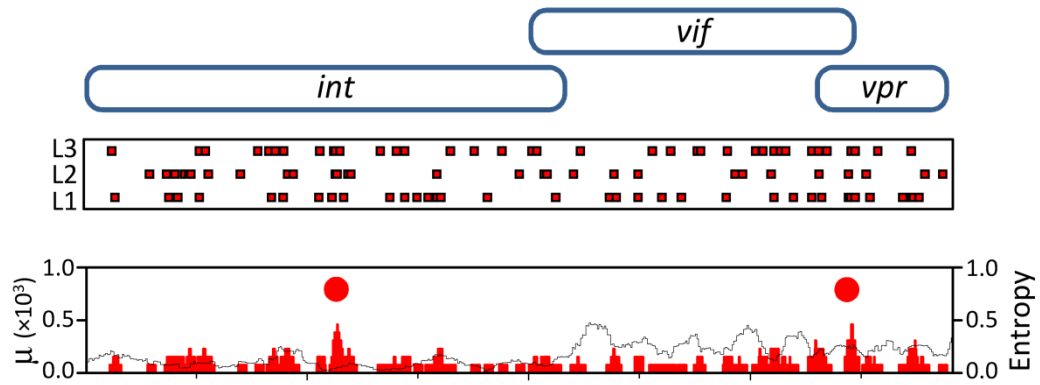

**Supplementary Figure 1. Location of spontaneous mutations across the *int-vif-vpr* region.** On top is shown the genetic map of the region. Nucleotide substitutions found for each of the lines L1-L3 after four infection cycles are shown as red squares (middle). Bottom: mutation rate ( $\mu$ ) averaged over 15-base sliding window (red bars). Significant mutation clusters are indicated with red circles.

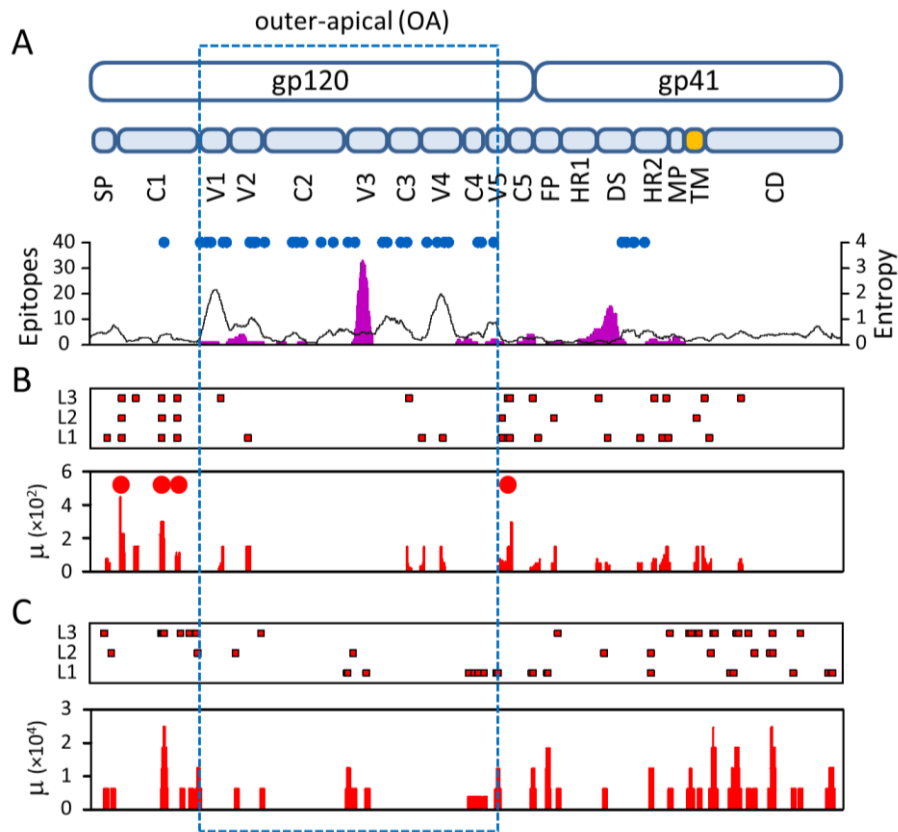

**Supplementary Figure 2. Location of A3-like and RT mutations across *env*.** The *env* genetic map is shown on top (**A**). Abbreviations are defined in Figure 2 legend. The 1 kb region encoding the extensively glycosylated outer-apical domains of gp120 is boxed, and glycosylation sites (blue dots), number of B-cell epitopes (pink histogram), and protein sequence variability calculated as the Shannon entropy averaged over a 15-residue sliding window (black skyline) are indicated. **B.** A3-like (G→A substitutions in GG or GA motifs) found in each of the lines L1-L3 are shown with red squares. Red bars indicate the mutation rate ( $\mu$ ) averaged over 15-base sliding window. Notice that the per-target mutation rate is considerably higher than for non-A3 mutations. A3 targets that were mutated more than once in different lines are shown with red circles. **C.** Substitutions attributed to the HIV-1 RT mutations (all except A3-like mutations) in each of the lines L1-L3 are shown with red squares. Red bars indicate the mutation rate ( $\mu$ ) averaged over 15-base sliding window.

**Supplementary Table 1.** Shuttle vector primers used for cloning and PCR.

| <b>Name</b> | <b>Orientation</b> | <b>Sequence (5'-3')</b>            |
|-------------|--------------------|------------------------------------|
| Env_F_Mlu   | Forward            | ACCCGACACGCGTTGGCAATGAGAGTGATGGG   |
| Env_R_Xho   | Reverse            | GACTAGCTCGAGTTTTGACCACTGCCACCC     |
| IVV_F_Mlu   | Forward            | ACCCGACACGCGTTTTTTAGATGGGATAGATAAG |
| IVV_R_Xho   | Reverse            | GACTAGCTCGAGGCTATGTTGGCACCCAATTC   |
| Env_F       | Forward            | GGCAATGAGAGTGATGGGGA               |
| Env_R       | Reverse            | TTTTTGACCACTGCCACCCA               |
| IVV_F       | Forward            | TTTTTAGATGGGATAGATAAGGCTC          |
| IVV_R       | Reverse            | GCTATGTTGGCACCCAATTC               |

**Supplementary Table 2.** Primers used for nested limiting-dilution PCR of patient samples.

| <b>Patients</b> | <b>Name</b> | <b>Orientation</b> | <b>Sequence (5'-3')</b>           | <b>HXB2 location</b> |
|-----------------|-------------|--------------------|-----------------------------------|----------------------|
| All except      | 294TU       | Forward            | ATGGCTTAGGGCAACATATCTATG          | 5677-5700            |
| R14-R115        | 163U5D      | Reverse            | CTGAGGGATCTCTAGTTACCAGAG          | 9664-9687            |
|                 | 551VU       | Forward            | GGAAGCCATAATAAGAATTCTGCAACAACTGC  | 5729-5760            |
|                 | 555U5       | Reverse            | CCAGAGTCACACAACCGCGGGGCACACACTACT | 9637-9669            |
| R14             | 3'HIV-O-S   | Forward            | CAAATTTTCGGGTTTATTACAGGGACA       | 4890-4917            |
|                 | 163U5D      | Reverse            | CTGAGGGATCTCTAGTTACCAGAG          | 9664-9687            |
|                 | 294TU       | Forward            | ATGGCTTAGGGCAACATATCTATG          | 5677-5700            |
|                 | 555         | Reverse            | CCAGAGTCACACAACCGCGGGGCACACACTACT | 9637-9669            |
| R15             | 3'HIV-O-S 3 | Forward            | TACAGTGCAGGGGAAAGAATAATAGACATAATA | 4809-4834            |
|                 | 555U5       | Reverse            | CCAGAGTCACACAACCGCGGGGCACACACTACT | 9637-9669            |
|                 | 551         | Forward            | GGAAGCCATAATAAGAATTCTGCAACAACTGC  | 5729-5760            |
|                 | 2R3.B6R     | Reverse            | TGAAGCACTCAAGGCAAGCTTTATTGAGGC    | 9607-9636            |
